# Supplementary material for: Single point calibration for semi-quantitative screening based on an internal reference in thin layer chromatography-SERS: the case of Rhodamine B in chili oil
Source: Royal Society of Chemistry journal article supplement (doi:10.1039/c4ay01487a), 2014-01-01
Supplement: c4ay01487a1.pdf [file c4ay01487a1.pdf]

## Electronic Supplementary Information

Manuscript Title: Single point calibration for semi-quantitative screening based on internal reference in thin layer chromatography-SERS: the case of Rhodamine B in chili oil

Author(s): Cong Wang,<sup>a</sup> Fansheng Cheng,<sup>a</sup> Yonghong Wang,<sup>c</sup> Zhengjun Gong,<sup>b</sup> Meikun Fan,<sup>b\*</sup> and Jianming Hu<sup>d\*</sup>

### Experimental methods

10  $\mu\text{L}$  of RhB ethanol solution ( $1.00 \times 10^{-5}$  M) was dropped onto TLC plate, 10  $\mu\text{L}$  of additional Ag NPs solution (1 mM) was dropped at the same place to get SERS signal. For comparison, the Raman spectrum of a control where only Ag NPs were added was also recorded.

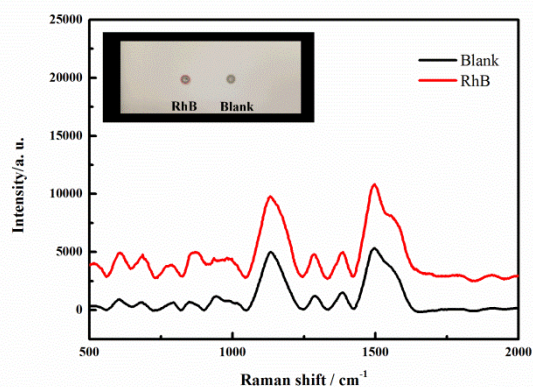

**Figure s1:** SERS spectra of RhB and blank silver colloids solution on TLC plate, obtained at 785 nm with 20 $\times$  microscope objective (N. A. =0.25) and 5s integration time.

No RhB SERS signal could be identified by this method, even though the concentration of RhB solution reaches  $1.00 \times 10^{-5}$  M and the color of the RhB can be seen through naked eye.
